# Supplementary material for: Improved biocatalytic cascade conversion of CO2 to methanol by enzymes Co-immobilized in tailored siliceous mesostructured cellular foams
Source: Royal Society of Chemistry journal article supplement (doi:10.1039/d1cy01354h), 2021-01-01
Supplement: d1cy01354h1.pdf [file d1cy01354h1.pdf]

## Electronic supporting information

### **Improved Biocatalytic Cascade Conversion of CO<sub>2</sub> to Methanol by Enzymes Co-immobilized in Tailored Siliceous Mesostructured Cellular Foams**

Milene Zezzi do Valle Gomes<sup>\*#a</sup>, Gerard Masdeu<sup>#b</sup>, Patrick Eiring<sup>c</sup>, Alexander Kuhlemann<sup>c</sup>, Markus Sauer<sup>c</sup>, Björn Åkerman<sup>b</sup>, Anders E.C. Palmqvist<sup>a</sup>

<sup>a</sup>Chalmers University of Technology, Department of Chemistry and Chemical Engineering, Applied Chemistry, SE-41296 Gothenburg, Sweden

<sup>b</sup>Chalmers University of Technology, Department of Chemistry and Chemical Engineering, Physical Chemistry, SE-41296 Gothenburg, Sweden

<sup>c</sup>Department of Biotechnology and Biophysics, Biocenter, University of Würzburg, Am Hubland, D-97074 Würzburg, Germany

<sup>#</sup>M.Z.V.G. and G.M. contributed equally to this work.

<sup>\*</sup>Corresponding author: Milene.zezzi@gmail.com

Tel: +46 31 772 2983

## S1. Nitrogen sorption analysis

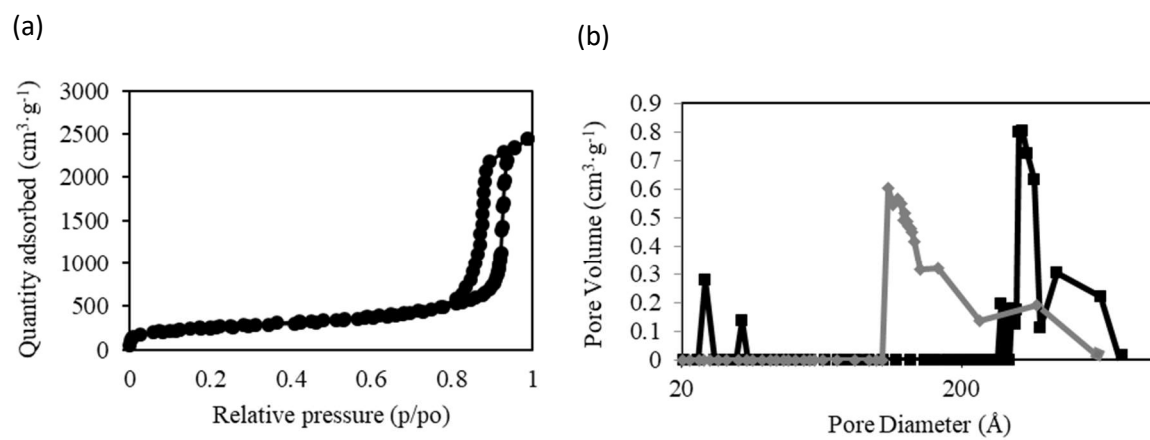

**Figure S1.** Nitrogen sorption measurements for MCF. (a) Nitrogen adsorption-desorption isotherms and (b) pore size distribution (black line) and window size distribution (grey line).

## S2. TGA analysis

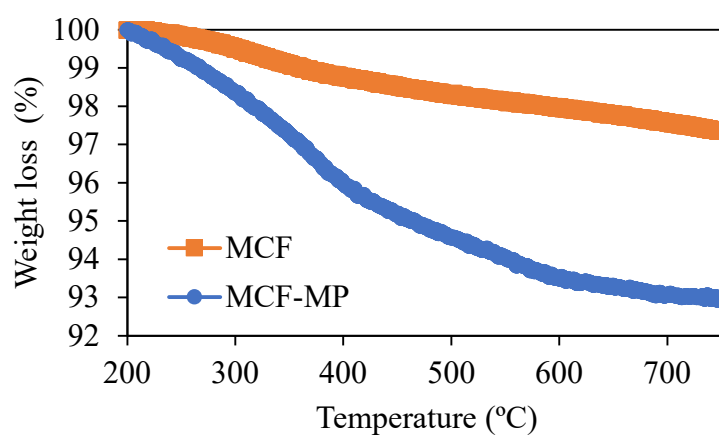

**Figure S2.** TGA measurements for the MCF and MCF-MP.

### S3. Individual distribution of FateDH, FaldDH, ADH in MCF

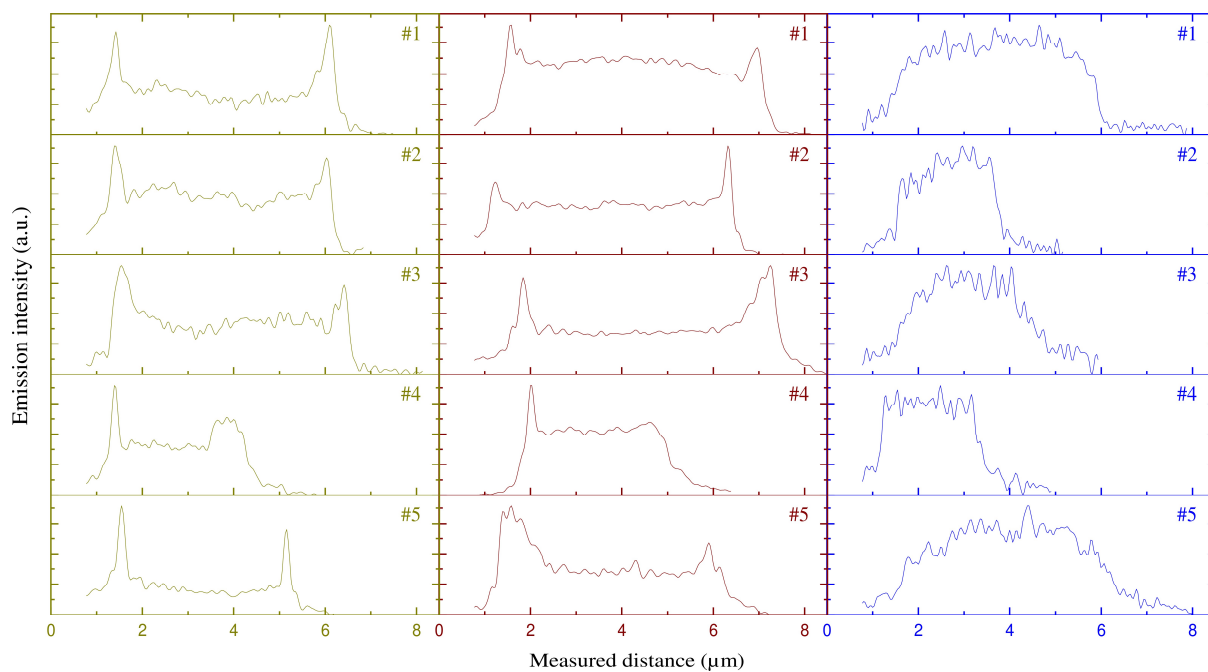

**Figure S3.** Intensity profiles of particles #1–#5 in Figure 2. Yellow: FateDH-Cy3, red: FaldDH-Cy5, blue: ADH-AF488.

## S4. Co-distribution of FateDH, FaldDH, ADH in MCF

### P<sub>LD</sub>150 in reaction order

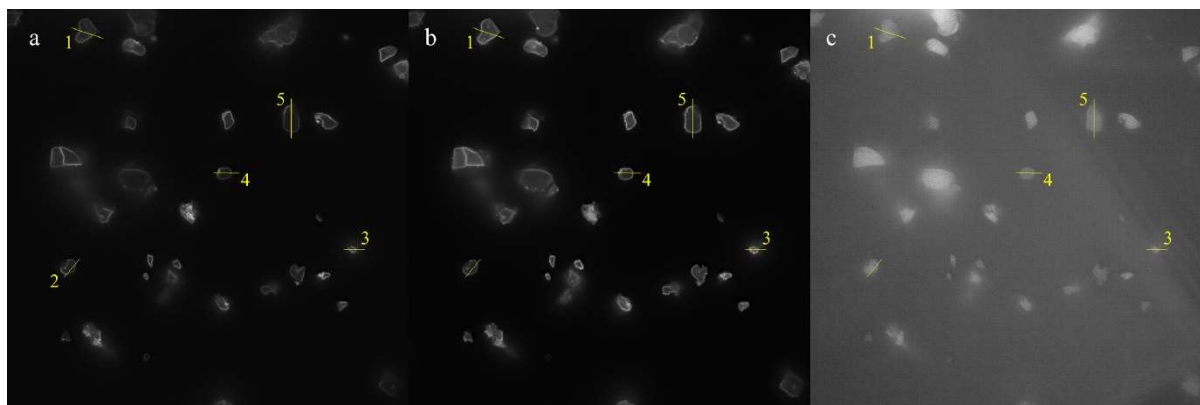

**Figure S4.** Enzyme distribution along the MCF particle after the immobilization in reaction order with P<sub>LD</sub>150. (a) FateDH-Cy3, (b) FaldDH-Cy5, (c) ADH-AF488.

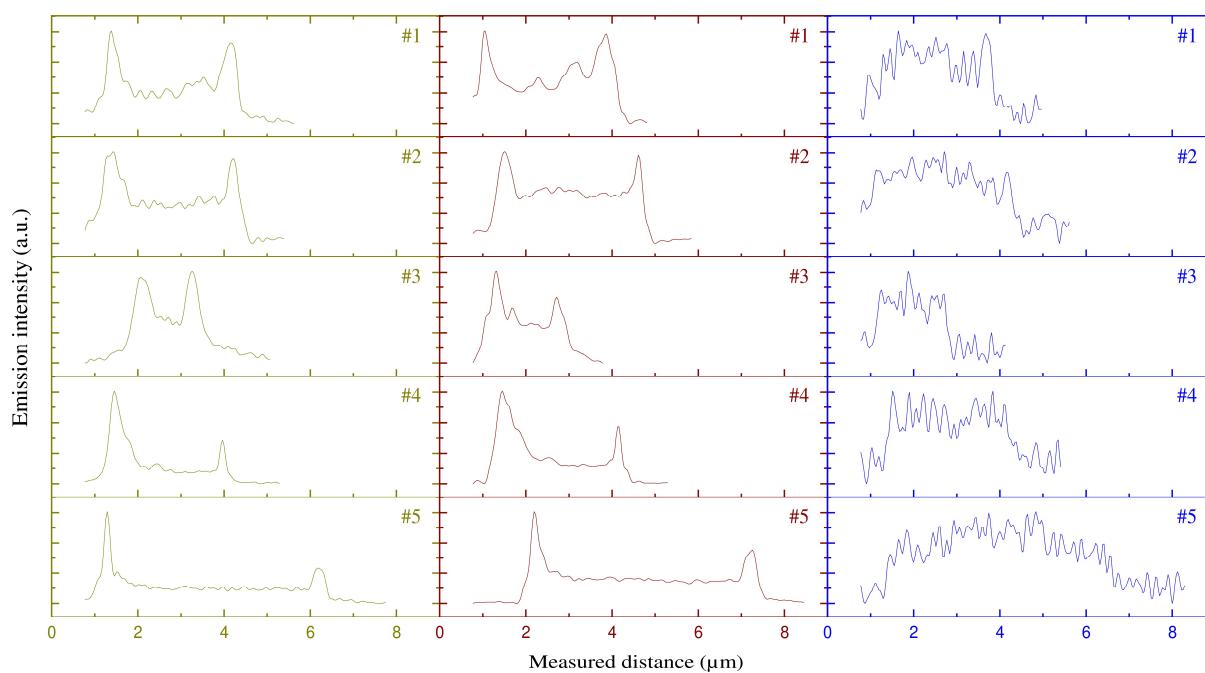

**Figure S5.** Intensity profiles of particles #1–#5 in Figure 4a according to individual imaging in Figure S4. Yellow: FateDH-Cy3, red: FaldDH-Cy5, blue: ADH-AF488.

## **P<sub>LD</sub>150 in size order**

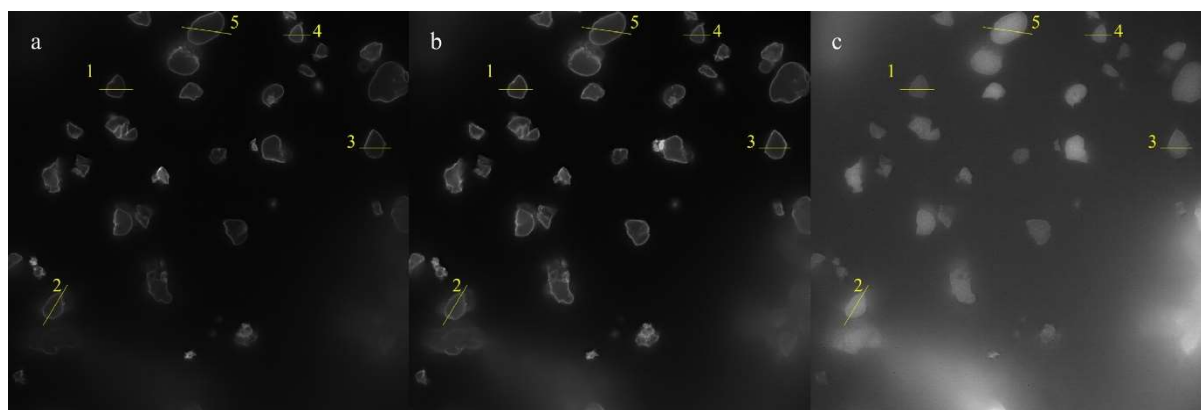

**Figure S6.** Enzyme distribution along the MCF particle after the immobilization in size order with P<sub>LD</sub>150. (a) FateDH-Cy3, (b) FaldDH-Cy5, (c) ADH-AF488.

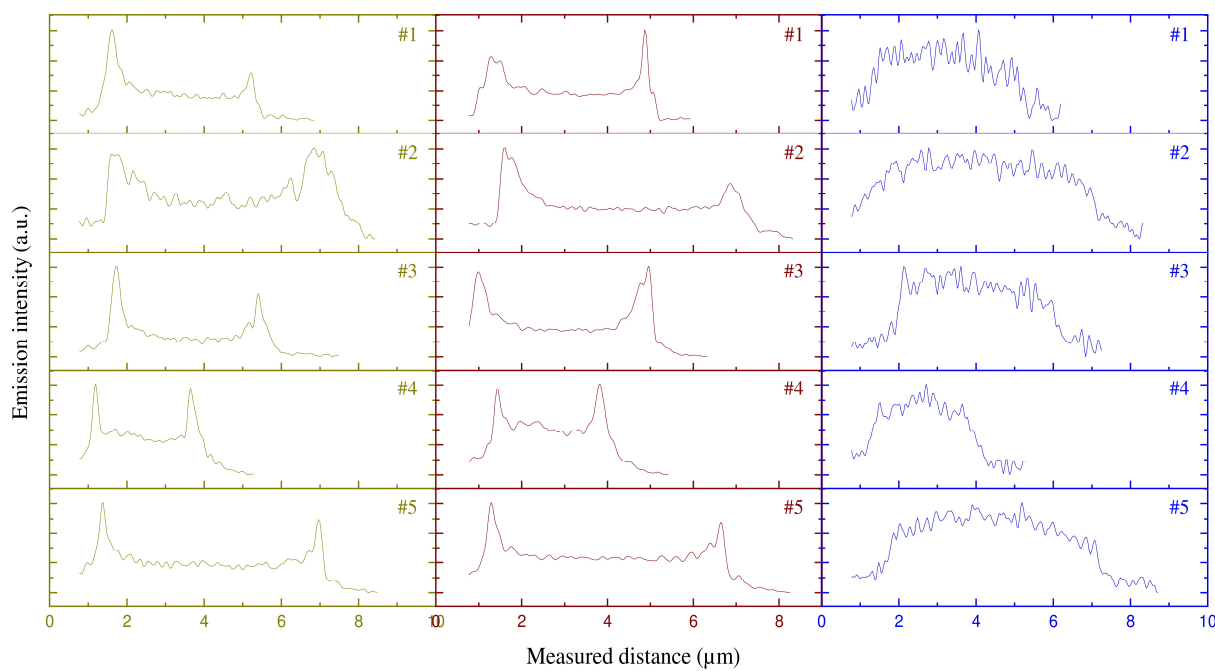

**Figure S7.** Intensity profiles of particles #1–#5 in Figure 4b according to individual imaging in Figure S6. Yellow: FateDH-Cy3, red: FaldDH-Cy5, blue: ADH-AF488.

## **P<sub>LD50</sub> in size order**

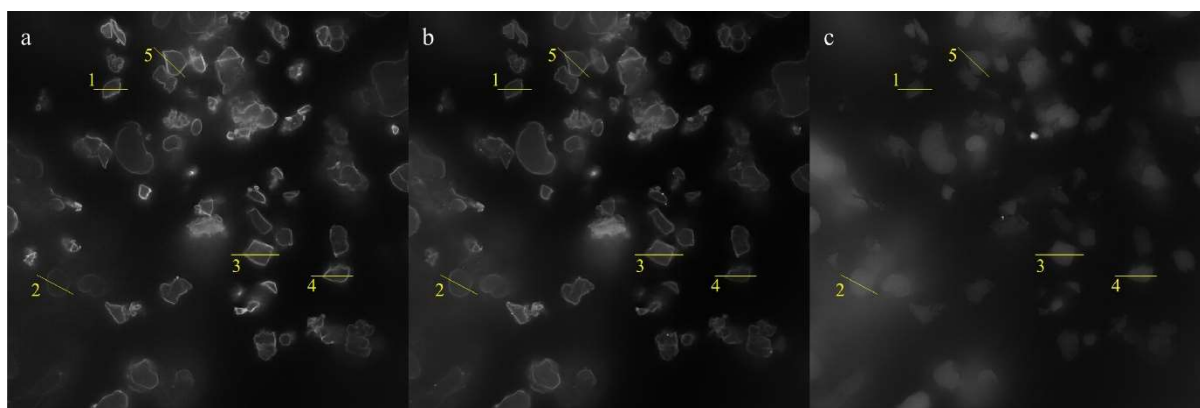

**Figure S8.** Enzyme distribution along the MCF particle after the immobilization in size order with P<sub>LD50</sub>. (a) FateDH-Cy3, (b) FaldDH-Cy5, (c) ADH-AF488.

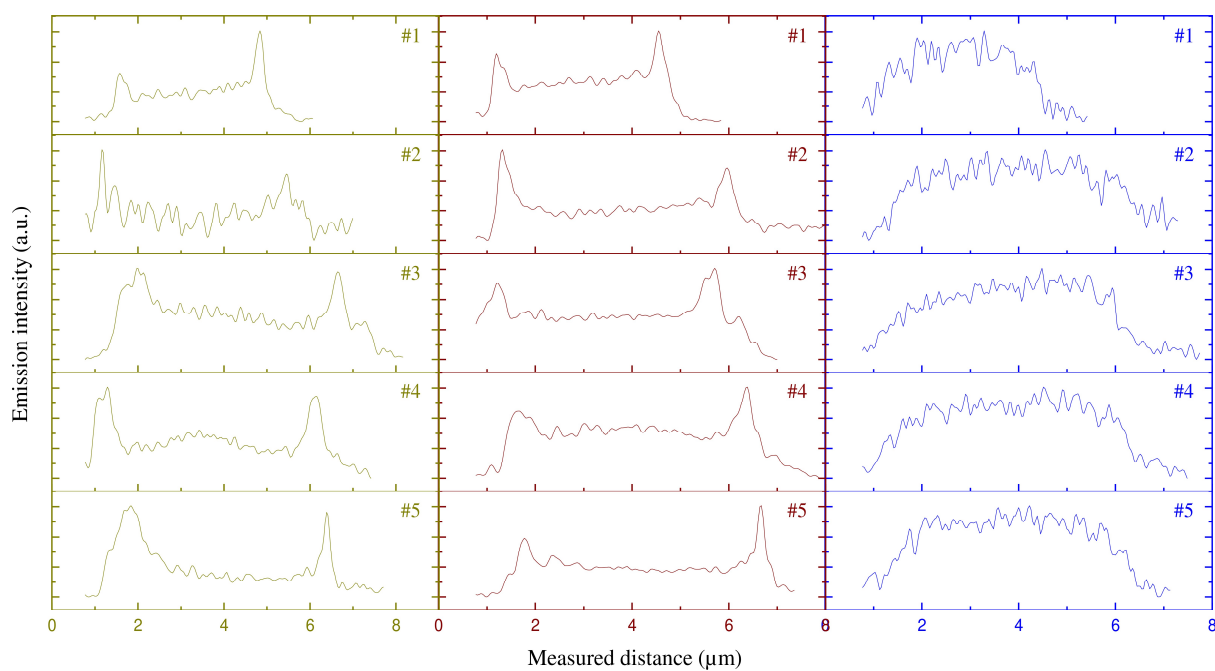

**Figure S9.** Intensity profiles of particles #1–#5 in Figure 4c according to individual imaging in Figure S8. Yellow: FateDH-Cy3, red: FaldDH-Cy5, blue: ADH-AF488.
